# Supplementary material
Source: PubMed Central journal article supplement (PMC4432188)
Supplement: AAC.00079-15_zac006154018so1.pdf [file AAC.00079-15_zac006154018so1.pdf]

Supplemental Table 1: Initial Isolate Analysis

|                                                     | N (%)       | Mupirocin susceptible (n = 201) | Mupirocin resistant (n = 48) | Univariate OR (95% CI) | P value | Multivariate OR* (95% CI) | P value |
|-----------------------------------------------------|-------------|---------------------------------|------------------------------|------------------------|---------|---------------------------|---------|
| Mean age (years)                                    |             | 4.86                            | 7.84                         | 1.116 (1.051, 1.186)   | <0.001  |                           |         |
| Female sex                                          | 115 (46.18) | 90 (44.78%)                     | 25 (52.08%)                  | 1.341 (.713, 2.519)    | 0.362   |                           |         |
| History of mupirocin use                            | 88 (35.34)  | 47 (23.38%)                     | 41 (85.42%)                  | 19.191 (8.076, 45.604) | <0.001  | 28.912 (9.058, 92.281)    | <0.001  |
| Atopic dermatitis                                   | 138 (55.42) | 105 (52.24%)                    | 33 (68.75%)                  | 2.101 (1.111, 3.975)   | 0.022   |                           |         |
| Additional dermatologic diagnosis                   | 80 (32.13)  | 64 (31.84%)                     | 16 (33.33%)                  | 1.070 (0.548, 2.091)   | 0.842   |                           |         |
| Immunosuppression                                   | 9 (3.63)    | 5 (2.50%)                       | 4 (8.33%)                    | 3.545 (0.915, 13.743)  | 0.067   |                           |         |
| Outpatient                                          | 239 (95.98) | 195 (97.01%)                    | 44 (91.67%)                  | 0.338 (0.092, 1.250)   | 0.104   | 0.013 (0.001, 0.145)      | <0.001  |
| <b>Zip code group</b>                               |             |                                 |                              |                        |         |                           |         |
| 1. Mid and Lower Manhattan                          | 51 (20.48)  | 47 (23.38%)                     | 4 (8.33%)                    | 1                      |         |                           |         |
| 2. Brooklyn, Queens, Long Island, and Staten Island | 42 (16.87)  | 32 (15.95)                      | 10 (20.83%)                  | 3.672 (1.059, 12.733)  | 0.04    |                           |         |
| 3. Upper Manhattan and the Bronx                    | 75 (30.12)  | 55 (27.36%)                     | 20 (41.67%)                  | 4.273 (1.364, 13.386)  | 0.013   |                           |         |
| 4. Connecticut and Northern New York state          | 37 (14.86)  | 29 (14.43%)                     | 8 (16.67%)                   | 3.241 (0.896, 11.733)  | 0.073   |                           |         |
| 5. New Jersey                                       | 41 (16.47)  | 35 (17.41%)                     | 6 (12.50%)                   | 2.014 (0.528, 7.683)   | 0.305   |                           |         |
| Other                                               | 3 (1.20)    | 3 (1.49%)                       | 0 (0.00%)                    |                        |         |                           |         |
| <b>Primary diagnosis</b>                            |             |                                 |                              |                        |         |                           |         |
| 1. Atopic dermatitis                                | 91 (36.55)  | 69 (34.33%)                     | 22 (45.83%)                  | 1                      |         | 1                         |         |
| 2. Dermatitis NOS                                   | 41 (16.47)  | 40 (19.90%)                     | 1 (2.08%)                    | 0.078 (0.010, 0.604)   | 0.015   | 0.047 (0.004, 0.595)      | 0.018   |
| 3. Impetigo                                         | 37 (14.86)  | 31 (15.42%)                     | 6 (12.50%)                   | 0.607 (0.224, 1.646)   | 0.327   | 0.417 (0.113, 1.539)      | 0.189   |
| 4. Folliculitis, pustulosis, abscess                | 35 (14.06)  | 27 (13.43%)                     | 8 (16.67%)                   | 0.929 (0.369, 2.340)   | 0.876   | 0.893 (0.269, 2.961)      | 0.853   |
| 5. Epidermolysis bullosa                            | 16 (6.43)   | 6 (2.99%)                       | 10 (20.83%)                  | 5.227 (1.705, 16.023)  | 0.004   | 3.381 (0.768, 14.883)     | 0.107   |
| Other                                               | 29 (11.65)  | 28 (13.93%)                     | 1 (2.08%)                    | 0.112 (0.014, 0.871)   | 0.036   | 0.009 (<0.001, 0.300)     | 0.008   |
| <b>Culture Site</b>                                 |             |                                 |                              |                        |         |                           |         |
| Head                                                | 71 (28.51)  | 59 (29.35%)                     | 12 (25.00%)                  | 0.802 (0.390, 1.649)   | 0.549   |                           |         |
| Nares                                               | 36 (14.46)  | 24 (11.94%)                     | 12 (25.00%)                  | 2.458 (1.127, 5.363)   | 0.024   |                           |         |
| Trunk                                               | 19 (7.63)   | 15 (7.46%)                      | 4 (8.33%)                    | 1.1273 (0.357, 3.566)  | 0.838   | 0.237 (0.045, 1.255)      | 0.091   |

|                                |                |                |                |                         |       |  |  |
|--------------------------------|----------------|----------------|----------------|-------------------------|-------|--|--|
| Extremity                      | 108<br>(43.37) | 79 (39.30%)    | 29<br>(60.42%) | 2.357 (1.238,<br>4.488) | 0.009 |  |  |
| Skin Fold                      | 89 (35.74)     | 71 (35.32%)    | 18<br>(37.50%) | 1.099 (0.572,<br>2.109) | 0.777 |  |  |
| Unspecified                    | 5 (2.01)       | 4 (1.99%)      | 1 (2.08%)      | 1.048 (0.114,<br>9.593) | 0.967 |  |  |
| <b>Strain characteristics</b>  |                |                |                |                         |       |  |  |
| MRSA                           | 37 (14.86)     | 22<br>(10.95%) | 15<br>(31.25%) | 3.698 (1.740,<br>7.861) | 0.001 |  |  |
| Additional Strain(s)           | 30 (12.05)     | 23 (11.44%)    | 7 (14.58%)     | 1.321 (0.531,<br>3.288) | 0.549 |  |  |
| <b>Amount bacterial growth</b> |                |                |                |                         |       |  |  |
| Few                            | 73 (30.29)     | 65 (33.16%)    | 8 (17.78%)     | 1                       |       |  |  |
| Moderate                       | 107<br>(44.40) | 85 (43.37%)    | 22<br>(48.89%) | 2.103 (0.880,<br>5.026) | 0.094 |  |  |
| Many                           | 61 (25.31)     | 46 (23.47%)    | 15<br>(33.33%) | 2.649 (1.038,<br>6.766) | 0.042 |  |  |

OR: Odds Ratio

CI: Confidence Interval

\* For the multivariate analysis, variables trimmed from the backward model selection are excluded and only variables selected for the final model are shown.

Supplemental Table 2: Co-Infecting Species Identified

| <u>Species</u>                                                      | <u>Frequency</u> |
|---------------------------------------------------------------------|------------------|
| Pseudomonas aeruginosa                                              | 7                |
| Streptococcus pyogenes (Group A)                                    | 7                |
| Streptococcus agalactiae (Group B)                                  | 6                |
| Acinetobacter baumannii                                             | 5                |
| Enterococcus faecalis                                               | 5                |
| Candida albicans                                                    | 3                |
| Diphtheroids                                                        | 3                |
| Escherichia coli                                                    | 3                |
| Klebsiella pneumoniae                                               | 3                |
| Proteus mirabilis                                                   | 3                |
| Acinetobacter iwoffii                                               | 1                |
| Bacillus cereus                                                     | 1                |
| Candida parapsilosis                                                | 1                |
| Coagulase negative staphylococci                                    | 1                |
| Enterobacter cloacae                                                | 1                |
| Group C beta-hemolytic streptococci                                 | 1                |
| Klebsiella oxytoca                                                  | 1                |
| Serratia marcescens                                                 | 1                |
| Viridans streptococci                                               | 1                |
| Not otherwise specified (gram negative rods,<br>gram positive rods) | 6                |
| Total                                                               | 60               |
